# Supplementary material for: High-performance supercapacitor material based on Ni(OH)2 nanowire-MnO2 nanoflakes core–shell nanostructures
Source: Royal Society of Chemistry journal article supplement (doi:10.1039/c2cc18079k), 2012-01-01
Supplement: c2cc18079k.pdf [file c2cc18079k.pdf]

## High-performance supercapacitor material based on Ni(OH)<sub>2</sub> nanowire-MnO<sub>2</sub> nanoflakes core/shell nanostructures

Hao Jiang,<sup>a</sup> Chunzhong Li,<sup>\*,a</sup> Ting Sun,<sup>b</sup> Jan Ma<sup>b</sup>

<sup>a</sup> Key Laboratory for Ultrafine Materials of Ministry of Education, School of Materials Science and Engineering, East China University of Science & Technology, Shanghai 200237, China

<sup>b</sup> School of Materials Science and Engineering, Nanyang Technological University, Singapore 639798, Singapore

\* Electronic mail: [czli@ecust.edu.cn](mailto:czli@ecust.edu.cn) (Prof. Chunzhong Li)

### Part I: Experimental

*Synthesis of Ni(OH)<sub>2</sub> nanowire-MnO<sub>2</sub> nanoflakes core/shell nanostructures:* All the reagents were analytical grade (Sigma-Aldrich) and used without further purification. Ni(OH)<sub>2</sub> nanowires have first been synthesized according to the method reported by Chu et al. (*Chem.–Eur. J.*, 2008, **14**, 5064). In a typical procedure of the synthesis of Ni(OH)<sub>2</sub> nanowire-MnO<sub>2</sub> nanoflakes core/shell nanostructures, 50 mg of the as-synthesized Ni(OH)<sub>2</sub> nanowires were firstly dispersed in 30 mL of deionized water. Then, 10 mL of 0.08 M KMnO<sub>4</sub> aqueous solution was added into the above suspension and the mixed solution was stirred by magnetic bar for about 3 h. After that, the mixed solution was transferred to a 50 mL Teflon-lined stainless autoclave. The autoclave was sealed and put in an electronic oven at 160 °C for 3 h and then naturally cooled down to room temperature. The precipitates were collected by filtration, washed with deionized water and absolute ethanol, and

finally dried at 60 °C for 6 h. Furthermore, the content of MnO<sub>2</sub> in hybrid can easily be tuned only by changing the KMnO<sub>4</sub> concentration.

*Synthesis of MnO<sub>2</sub> nanowires:* The MnO<sub>2</sub> nanowires with diameters of ~ 25 nm have been synthesized according to our previous work (*Energy Environ. Sci.*, 2011, **4**, 1813). In a typical process, Mn(NO<sub>3</sub>)<sub>2</sub>·4H<sub>2</sub>O (0.2685 g) and sodium dodecyl benzene sulfonate (SDBS, 0.3845 g) were first dissolved in 30 mL of deionized water. When the solution turned clear, KMnO<sub>4</sub> (0.2 M, 5 mL) was added to the above solution with continuous stirring for about 30 min. The resulting cloudy solution was transferred into a 50 mL Teflon-lined stainless steel autoclave, then heated at 180 °C for 4~6 h, and followed by natural cooling to room temperature. The precipitates, i.e. MnO<sub>2</sub> nanowires, were collected by filtration, washed with deionized water and absolute ethanol, and finally dried at 60 °C for 6 h.

*Characterization:* The as-prepared products were characterized with X-ray powder diffractometer (XRD; Shimadzu XRD-6000, Cu K $\alpha$  radiation) at a scan rate of 1 °C min<sup>-1</sup>, scanning electron microscopy (FESEM; JEOL, JSM-7600F) equipped with an energy dispersive X-ray spectrometer (EDS), and transmission electron microscopy (TEM; JEOL, JEM-2100F) operated at 200 kV. N<sub>2</sub> adsorption/desorption was determined by Brunauer-Emmett-Teller (BET) measurements using a Tristar-3000 surface area analyzer.

*Electrochemical measurements:* The electrochemical measurements (Autolab PGSTAT30 potentiostat) were conducted using a three-electrode mode in a 1 M Na<sub>2</sub>SO<sub>4</sub> aqueous solution. The working electrodes were prepared by mixing the active materials (80 wt%), acetylene black (15 wt%) and polyvinylidene fluoride (PVDF, 5 wt%) in NMP (N-methyl-2-pyrrolidone). A small amount of absolute ethanol was then added to the mixture to promote homogeneity. After that, the

mixture was coated onto the graphite paper ( $1 \text{ cm}^2$ ) to form the electrode layer by drying at  $120 \text{ }^\circ\text{C}$  for around two hours. The reference electrode and counter electrode were Ag/AgCl electrode and platinum foil, respectively. Typical CV curves were measured between  $-0.1$  and  $0.9 \text{ V}$ .

## Part II: Supplementary Figures

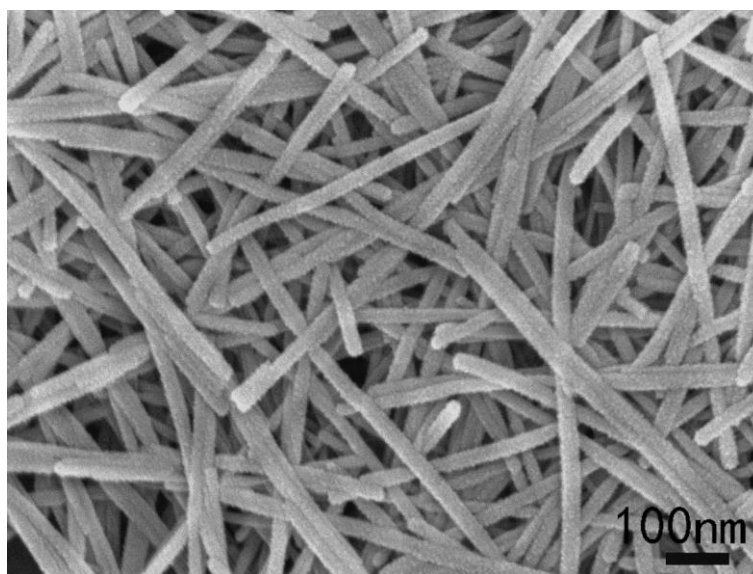

**Fig. S1** SEM image of the as-synthesized  $\text{Ni}(\text{OH})_2$  nanowires

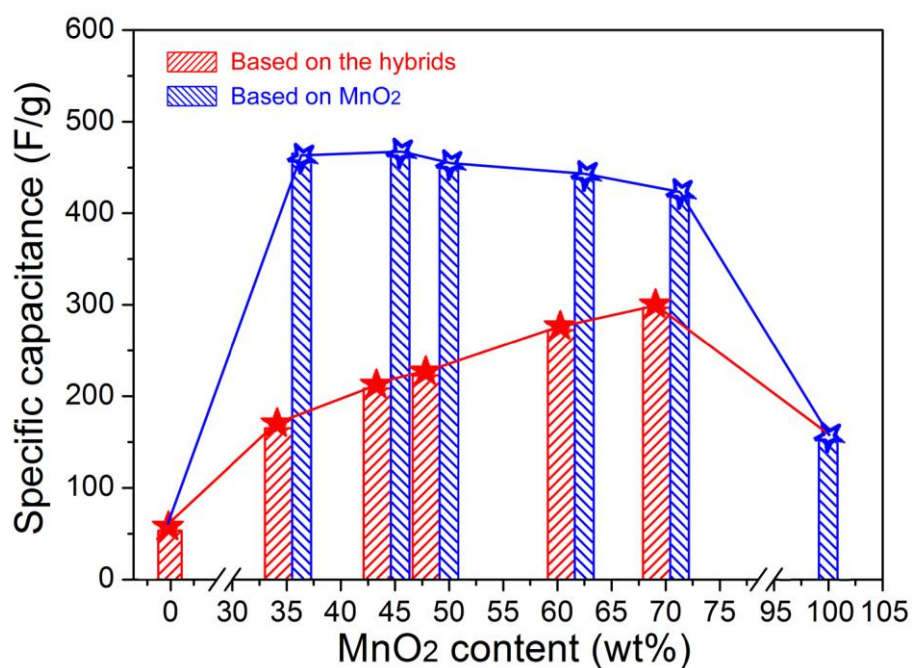

**Fig. S2** The specific capacitance calculated based on  $\text{MnO}_2$  content and the hybrid nanostructures,

respectively.

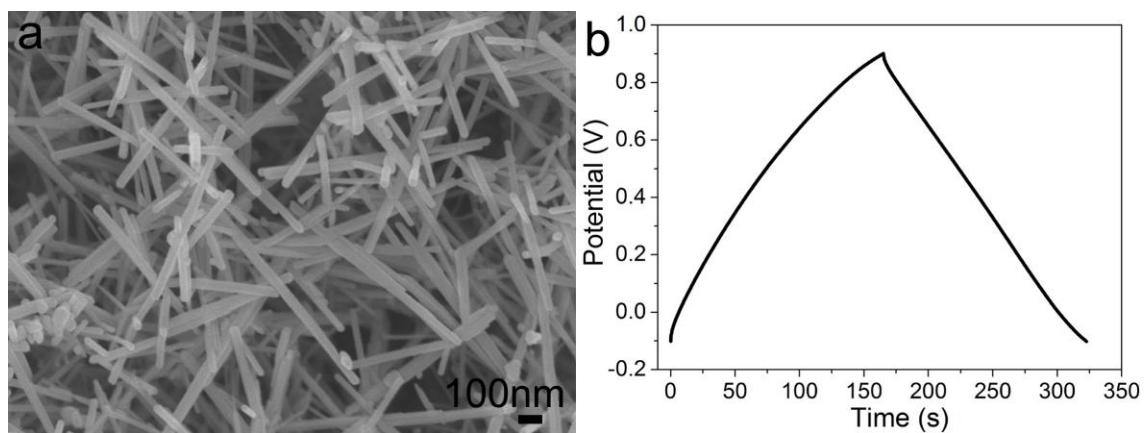

**Fig. S3** (a) SEM image of MnO<sub>2</sub> nanowires, (b) the corresponding charge-discharge curve at a current density of 1 A g<sup>-1</sup>.

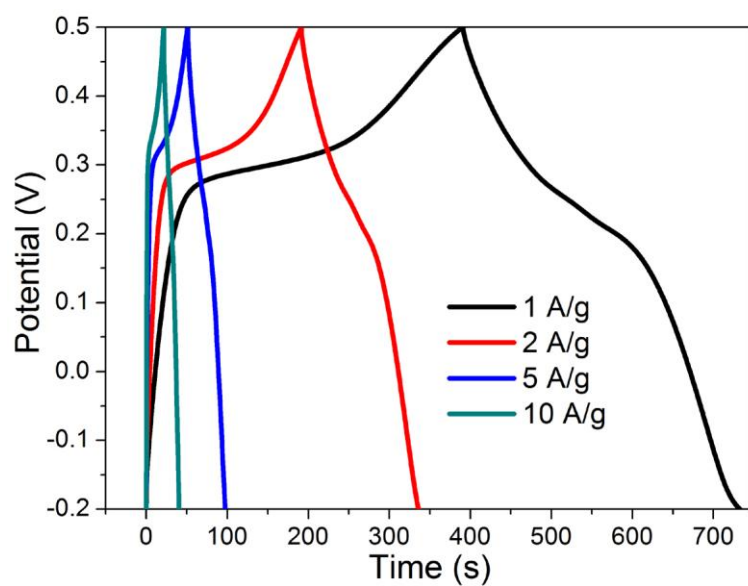

**Fig. S4** Charge-discharge curves of the hybrids at 1-10 A g<sup>-1</sup> in 1 M KOH aqueous solution. The hybrids show a high specific capacitance of 487.4 F g<sup>-1</sup> at 1 A g<sup>-1</sup>. Even at 10 g<sup>-1</sup>, a specific capacitance of 269 F g<sup>-1</sup> still can be reached.
